# Supplementary material for: Effect of Shengmai Yin on the DNA methylation status of nasopharyngeal carcinoma cell and its radioresistant strains
Source: PubMed Central journal article supplement — J Pharm Anal. 2020 Dec 2;11(6):783–90. doi: 10.1016/j.jpha.2020.11.010 (PMC8740367; doi:10.1016/j.jpha.2020.11.010), 2020-12-02
Supplement: mmc1.pdf [file mmc1.pdf]

### Chromatogram and Results

#### Injection Details

|                      |                      |                   |          |
|----------------------|----------------------|-------------------|----------|
| Injection Name:      | 人参皂苷Rg1 Re Rb1 五味子醇甲 | Run Time (min):   | 105.00   |
| Vial Number:         | RA1                  | Injection Volume: | 10.00    |
| Injection Type:      | Calibration Standard | Channel:          | UV_VIS_1 |
| Calibration Level:   | 1                    | Wavelength:       | n.a.     |
| Instrument Method:   | 生脉注射液                | Operator:         | wwl      |
| Processing Method:   | 生脉注射液                | Dilution Factor:  | 1.0000   |
| Injection Date/Time: | 12/01/18 13:44       | Sample Weight:    | 1.0000   |

chrom://cm7server/CM7SQLDV/yc/SS-ZS-275/2018/生脉注射液/18011102 17120105 17122702 wdx17010301 17120707 17120805 17120806.seq/961.smp/UV\_VIS\_1.channel/L

#### Chromatogram

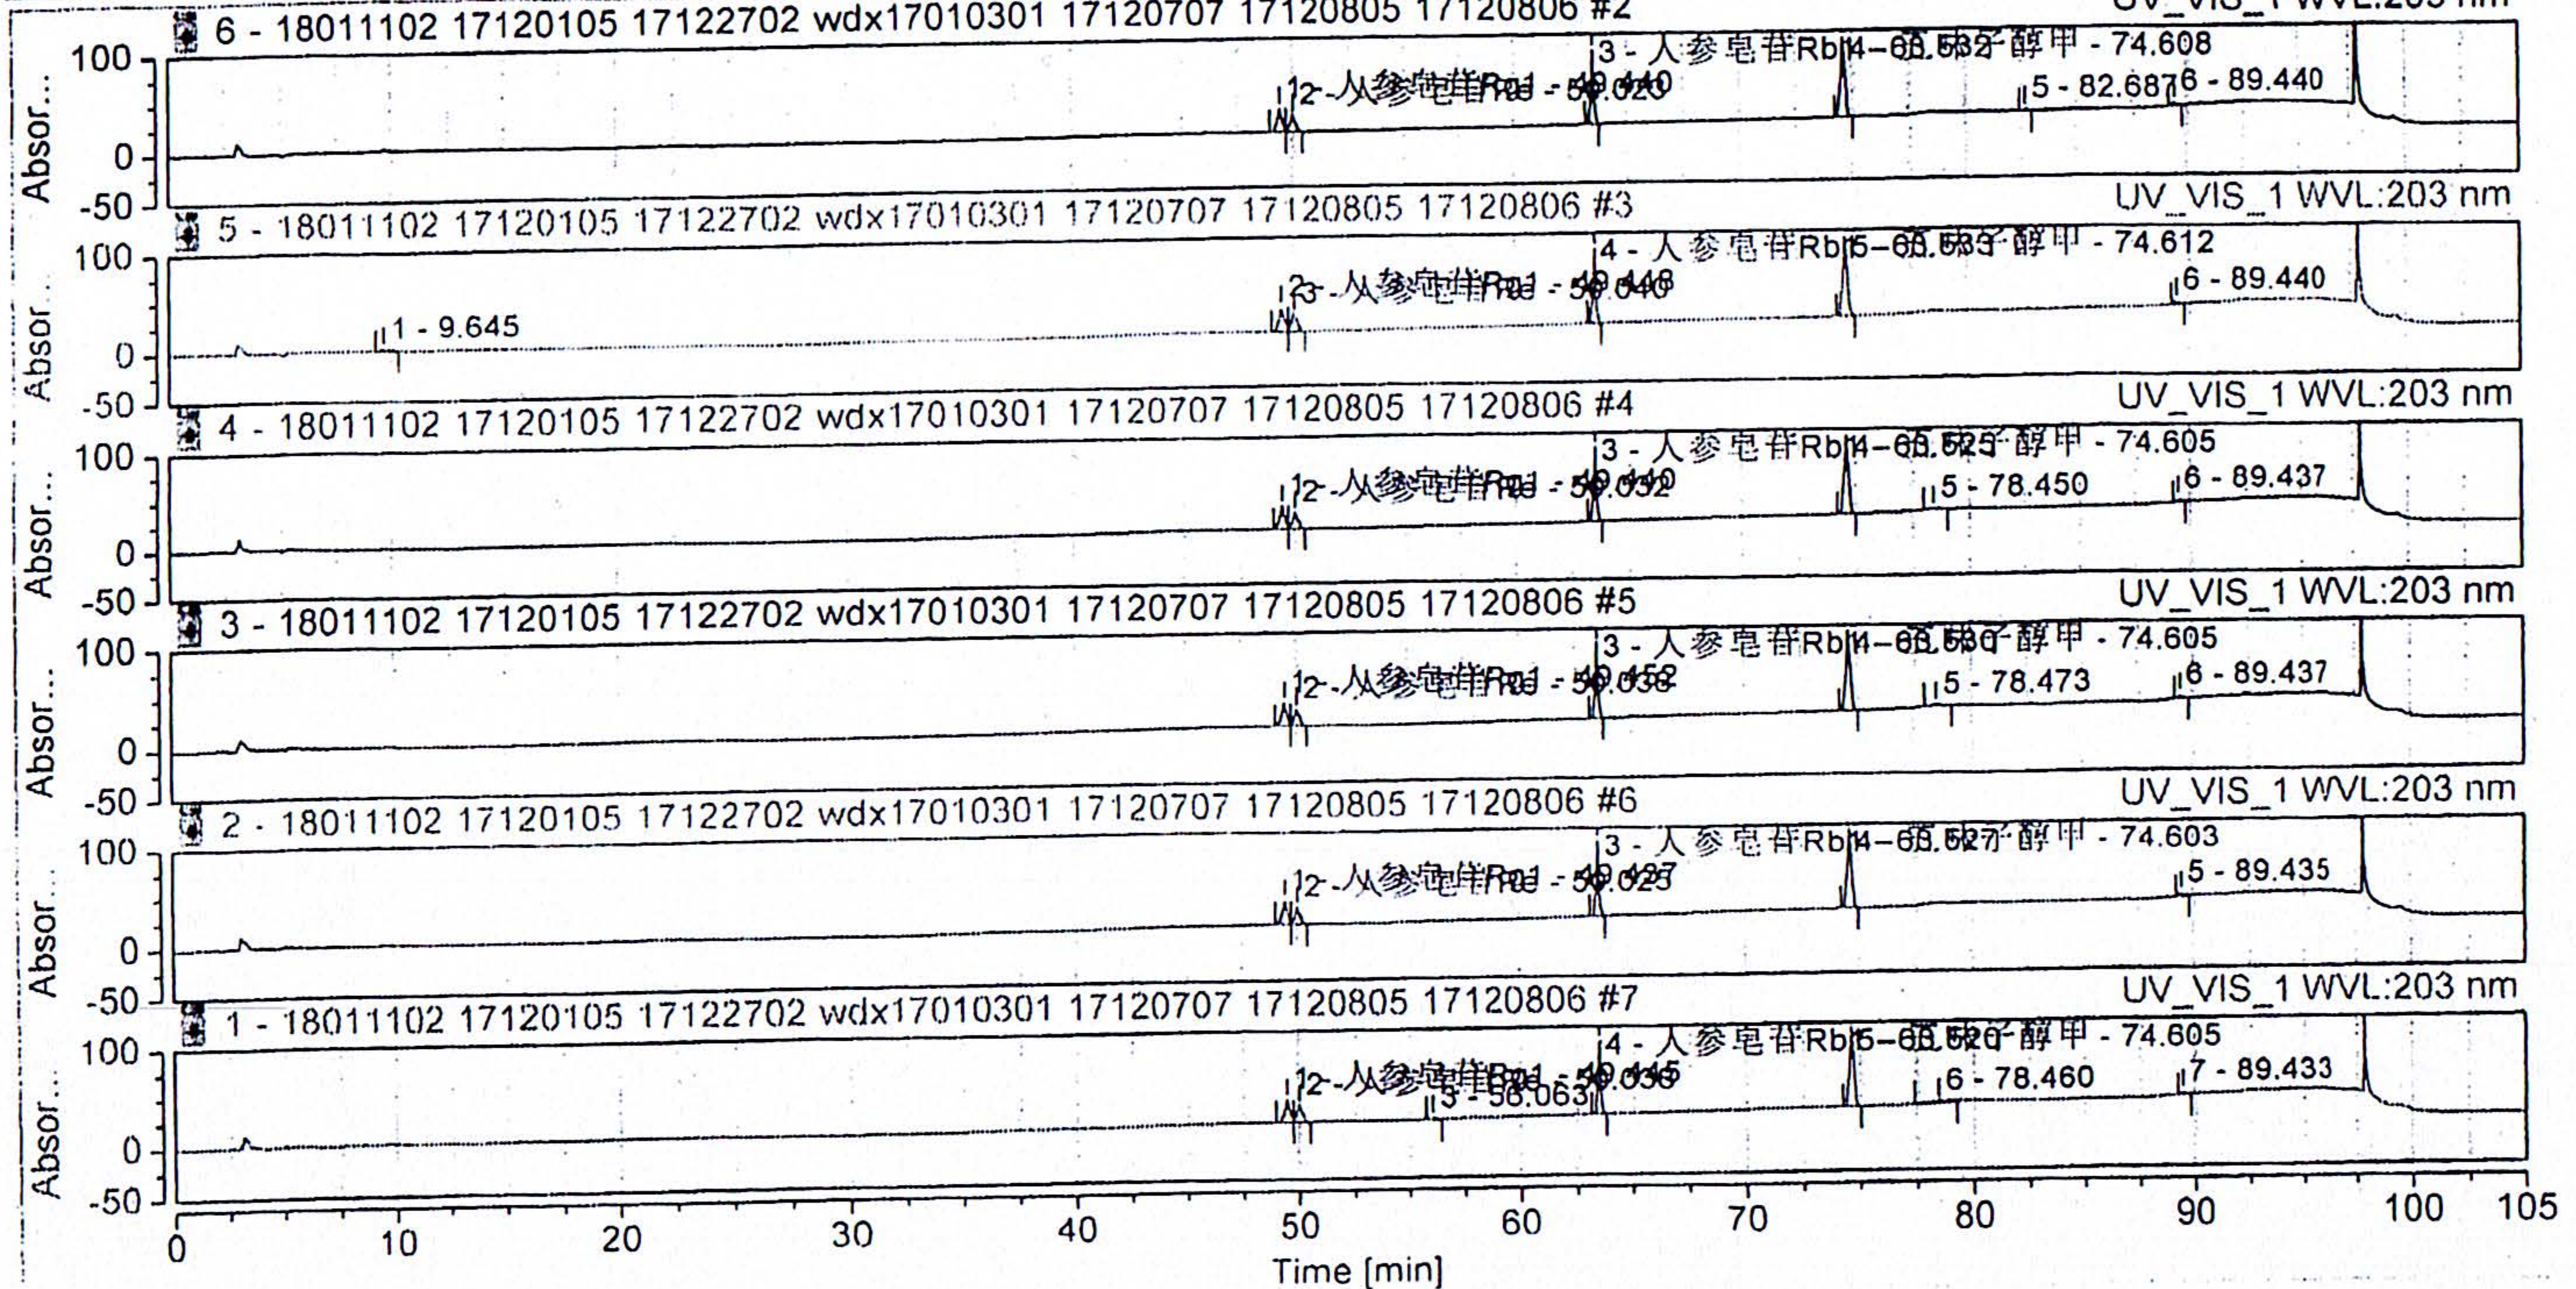

| No. | Injection Name       | Ret. Time min<br>UV_VIS_1<br>人参皂苷Rg1 | Area mAU*min<br>UV_VIS_1<br>人参皂苷Rg1 | Amount<br>UV_VIS_1<br>人参皂苷Rg1 | Position | Resolution (EP)<br>UV_VIS_1<br>人参皂苷Rg1 | Plates (EP)<br>UV_VIS_1<br>人参皂苷Rg1 |
|-----|----------------------|--------------------------------------|-------------------------------------|-------------------------------|----------|----------------------------------------|------------------------------------|
| 2   | 人参皂苷Rg1 Re Rb1 五味子醇甲 | 49.440                               | 5.7898                              | 0.0895                        | RA1      | 1.39                                   | 237358                             |
| 3   | 人参皂苷Rg1 Re Rb1 五味子醇甲 | 49.448                               | 5.8094                              | 0.0895                        | RA1      | 1.41                                   | 238704                             |
| 4   | 人参皂苷Rg1 Re Rb1 五味子醇甲 | 49.440                               | 5.7980                              | 0.0895                        | RA1      | 1.41                                   | 242014                             |
| 5   | 人参皂苷Rg1 Re Rb1 五味子醇甲 | 49.452                               | 5.8043                              | 0.0895                        | RA2      | 1.42                                   | 242348                             |
| 6   | 人参皂苷Rg1 Re Rb1 五味子醇甲 | 49.437                               | 5.8165                              | 0.0895                        | RA2      | 1.40                                   | 241822                             |
| 7   | 人参皂苷Rg1 Re Rb1 五味子醇甲 | 49.445                               | 5.8249                              | 0.0895                        | RA2      | 1.42                                   | 242269                             |

| No. | Injection Name       | Ret. Time min<br>UV_VIS_1<br>人参皂苷Rg1 | Inject Time         | Asymmetry (EP)<br>UV_VIS_1<br>人参皂苷Rg1 | 校正因子<br>UV_VIS_1<br>人参皂苷Rg1 | Rel.Std.Dev. (6)<br>% |
|-----|----------------------|--------------------------------------|---------------------|---------------------------------------|-----------------------------|-----------------------|
| 2   | 人参皂苷Rg1 Re Rb1 五味子醇甲 | 49.440                               | 2018/01/12 13:44:04 | 1.02                                  | 0.01546305                  |                       |
| 3   | 人参皂苷Rg1 Re Rb1 五味子醇甲 | 49.448                               | 2018/01/12 15:30:19 | 1.02                                  | 0.01541080                  |                       |
| 4   | 人参皂苷Rg1 Re Rb1 五味子醇甲 | 49.440                               | 2018/01/12 17:16:33 | 1.01                                  | 0.01544131                  |                       |
| 5   | 人参皂苷Rg1 Re Rb1 五味子醇甲 | 49.452                               | 2018/01/12 19:02:48 | 1.02                                  | 0.01542448                  |                       |
| 6   | 人参皂苷Rg1 Re Rb1 五味子醇甲 | 49.437                               | 2018/01/12 20:49:03 | 1.01                                  | 0.01539214                  |                       |
| 7   | 人参皂苷Rg1 Re Rb1 五味子醇甲 | 49.445                               | 2018/01/12 22:35:18 | 1.02                                  | 0.01536980                  | 0.22                  |

| No. | Injection Name | Ret. Time min<br>UV_VIS_1 | Area mAU*min<br>UV_VIS_1 | Amount<br>UV_VIS_1 | Position | Resolution (EP)<br>UV_VIS_1 | Plates (EP)<br>UV_VIS_1 |
|-----|----------------|---------------------------|--------------------------|--------------------|----------|-----------------------------|-------------------------|
|     |                |                           |                          |                    |          |                             |                         |

|   |                      | 人参皂苷Re | 人参皂苷Re | 人参皂苷Re |     | 人参皂苷Re | 人参皂苷Re |
|---|----------------------|--------|--------|--------|-----|--------|--------|
| 2 | 人参皂苷Rg1 Re Rb1 五味子醇甲 | 50.023 | 4.3668 | 0.0814 | RA1 | 43.76  | 211440 |
| 3 | 人参皂苷Rg1 Re Rb1 五味子醇甲 | 50.040 | 4.4145 | 0.0814 | RA1 | 43.53  | 208946 |
| 4 | 人参皂苷Rg1 Re Rb1 五味子醇甲 | 50.032 | 4.4048 | 0.0814 | RA1 | 43.47  | 206406 |
| 5 | 人参皂苷Rg1 Re Rb1 五味子醇甲 | 50.038 | 4.4261 | 0.0817 | RA2 | 44.19  | 217348 |
| 6 | 人参皂苷Rg1 Re Rb1 五味子醇甲 | 50.025 | 4.4334 | 0.0817 | RA2 | 43.65  | 207288 |
| 7 | 人参皂苷Rg1 Re Rb1 五味子醇甲 | 50.038 | 4.4366 | 0.0817 | RA2 | 12.68  | 208195 |

| No. | Injection Name       | Ret. Time<br>min<br>UV_VIS_1<br>人参皂苷Re | Inject Time         | Asymmetry (EP)<br>UV_VIS_1<br>人参皂苷Re | 校正因子<br>UV_VIS_1<br>人参皂苷Re | Rel.Std.Dev. (1)<br>% |
|-----|----------------------|----------------------------------------|---------------------|--------------------------------------|----------------------------|-----------------------|
| 2   | 人参皂苷Rg1 Re Rb1 五味子醇甲 | 50.023                                 | 2018/01/12 13:44:04 | n.a.                                 | 0.01863558                 |                       |
| 3   | 人参皂苷Rg1 Re Rb1 五味子醇甲 | 50.040                                 | 2018/01/12 15:30:19 | n.a.                                 | 0.01843442                 |                       |
| 4   | 人参皂苷Rg1 Re Rb1 五味子醇甲 | 50.032                                 | 2018/01/12 17:16:33 | n.a.                                 | 0.01847483                 |                       |
| 5   | 人参皂苷Rg1 Re Rb1 五味子醇甲 | 50.038                                 | 2018/01/12 19:02:48 | n.a.                                 | 0.01844750                 |                       |
| 6   | 人参皂苷Rg1 Re Rb1 五味子醇甲 | 50.025                                 | 2018/01/12 20:49:03 | n.a.                                 | 0.01841702                 |                       |
| 7   | 人参皂苷Rg1 Re Rb1 五味子醇甲 | 50.038                                 | 2018/01/12 22:35:18 | n.a.                                 | 0.01840364                 | 0.46                  |

| No. | Injection Name       | Ret. Time<br>min<br>UV_VIS_1<br>人参皂苷Rb1 | Area<br>mAU*min<br>UV_VIS_1<br>人参皂苷Rb1 | Amount<br>UV_VIS_1<br>人参皂苷Rb1 | Position | Resolution (EP)<br>UV_VIS_1<br>人参皂苷Rb1 | Plates (EP)<br>UV_VIS_1<br>人参皂苷Rb1 |
|-----|----------------------|-----------------------------------------|----------------------------------------|-------------------------------|----------|----------------------------------------|------------------------------------|
| 2   | 人参皂苷Rg1 Re Rb1 五味子醇甲 | 63.532                                  | 8.6088                                 | 0.1871                        | RA1      | 44.34                                  | 1909065                            |
| 3   | 人参皂苷Rg1 Re Rb1 五味子醇甲 | 63.533                                  | 8.7326                                 | 0.1871                        | RA1      | 44.32                                  | 1914493                            |
| 4   | 人参皂苷Rg1 Re Rb1 五味子醇甲 | 63.525                                  | 8.7366                                 | 0.1871                        | RA1      | 44.84                                  | 1950067                            |
| 5   | 人参皂苷Rg1 Re Rb1 五味子醇甲 | 63.530                                  | 8.7712                                 | 0.1865                        | RA2      | 44.87                                  | 1931263                            |
| 6   | 人参皂苷Rg1 Re Rb1 五味子醇甲 | 63.527                                  | 8.7843                                 | 0.1865                        | RA2      | 45.14                                  | 1974865                            |
| 7   | 人参皂苷Rg1 Re Rb1 五味子醇甲 | 63.520                                  | 8.7952                                 | 0.1865                        | RA2      | 44.92                                  | 1911450                            |

| No. | Injection Name       | Ret. Time<br>min<br>UV_VIS_1<br>人参皂苷Rb1 | Inject Time         | Asymmetry (EP)<br>UV_VIS_1<br>人参皂苷Rb1 | 校正因子<br>UV_VIS_1<br>人参皂苷Rb1 | Rel.Std.Dev. (1)<br>% |
|-----|----------------------|-----------------------------------------|---------------------|---------------------------------------|-----------------------------|-----------------------|
| 2   | 人参皂苷Rg1 Re Rb1 五味子醇甲 | 63.532                                  | 2018/01/12 13:44:04 | 0.95                                  | 0.02173179007               |                       |
| 3   | 人参皂苷Rg1 Re Rb1 五味子醇甲 | 63.533                                  | 2018/01/12 15:30:19 | 0.95                                  | 0.0214236381                |                       |
| 4   | 人参皂苷Rg1 Re Rb1 五味子醇甲 | 63.525                                  | 2018/01/12 17:16:33 | 0.95                                  | 0.02141378099               |                       |
| 5   | 人参皂苷Rg1 Re Rb1 五味子醇甲 | 63.530                                  | 2018/01/12 19:02:48 | 0.95                                  | 0.02126430353               |                       |
| 6   | 人参皂苷Rg1 Re Rb1 五味子醇甲 | 63.527                                  | 2018/01/12 20:49:03 | 0.96                                  | 0.02123255932               |                       |
| 7   | 人参皂苷Rg1 Re Rb1 五味子醇甲 | 63.520                                  | 2018/01/12 22:35:18 | 0.96                                  | 0.02120634338               | 0.92                  |

| No. | Injection Name       | Ret. Time<br>min<br>UV_VIS_1<br>五味子醇甲 | Area<br>mAU*min<br>UV_VIS_1<br>五味子醇甲 | Amount<br>UV_VIS_1<br>五味子醇甲 | Position | Resolution (EP)<br>UV_VIS_1<br>五味子醇甲 | Plates (EP)<br>UV_VIS_1<br>五味子醇甲 |
|-----|----------------------|---------------------------------------|--------------------------------------|-----------------------------|----------|--------------------------------------|----------------------------------|
| 2   | 人参皂苷Rg1 Re Rb1 五味子醇甲 | 74.608                                | 15.8184                              | 0.0189                      | RA1      | 25.75                                | 886352                           |
| 3   | 人参皂苷Rg1 Re Rb1 五味子醇甲 | 74.612                                | 15.8658                              | 0.0189                      | RA1      | 48.48                                | 883103                           |
| 4   | 人参皂苷Rg1 Re Rb1 五味子醇甲 | 74.605                                | 15.8425                              | 0.0189                      | RA1      | 6.55                                 | 905702                           |
| 5   | 人参皂苷Rg1 Re Rb1 五味子醇甲 | 74.605                                | 15.8898                              | 0.0188                      | RA2      | 6.31                                 | 914447                           |
| 6   | 人参皂苷Rg1 Re Rb1 五味子醇甲 | 74.603                                | 15.8866                              | 0.0188                      | RA2      | 49.87                                | 919150                           |
| 7   | 人参皂苷Rg1 Re Rb1 五味子醇甲 | 74.605                                | 15.8947                              | 0.0188                      | RA2      | 3.88                                 | 920181                           |

| No. | Injection Name       | Ret. Time<br>min<br>UV_VIS_1<br>五味子醇甲 | Inject Time         | Asymmetry (EP)<br>UV_VIS_1<br>五味子醇甲 | 校正因子<br>UV_VIS_1<br>五味子醇甲 | Rel.Std.Dev. (6)<br>% |
|-----|----------------------|---------------------------------------|---------------------|-------------------------------------|---------------------------|-----------------------|
| 2   | 人参皂苷Rg1 Re Rb1 五味子醇甲 | 74.608                                | 2018/01/12 13:44:04 | 0.94                                | 0.00119563                |                       |
| 3   | 人参皂苷Rg1 Re Rb1 五味子醇甲 | 74.612                                | 2018/01/12 15:30:19 | 0.95                                | 0.00119206                |                       |
| 4   | 人参皂苷Rg1 Re Rb1 五味子醇甲 | 74.605                                | 2018/01/12 17:16:33 | 0.95                                | 0.00119382                |                       |
| 5   | 人参皂苷Rg1 Re Rb1 五味子醇甲 | 74.605                                | 2018/01/12 19:02:48 | 0.96                                | 0.00118334                |                       |
| 6   | 人参皂苷Rg1 Re Rb1 五味子醇甲 | 74.603                                | 2018/01/12 20:49:03 | 0.96                                | 0.00118358                |                       |
| 7   | 人参皂苷Rg1 Re Rb1 五味子醇甲 | 74.605                                | 2018/01/12 22:35:18 | 0.96                                | 0.00118297                | 0.50                  |

### Chromatogram and Results

#### Injection Details

|                      |                |                   |          |
|----------------------|----------------|-------------------|----------|
| Injection Name:      | 生脉注射液17120105  | Run Time (min):   | 105.00   |
| Vial Number:         | RA4            | Injection Volume: | 10.00    |
| Injection Type:      | Unknown        | Channel:          | UV_VIS_1 |
| Calibration Level:   |                | Wavelength:       | n.a.     |
| Instrument Method:   | 生脉注射液          | Operator:         | wwl      |
| Processing Method:   | 生脉注射液          | Dilution Factor:  | 1.0000   |
| Injection Date/Time: | 13/01/18 05:35 | Sample Weight:    | 1.0000   |

chrom://cm7server/CM7SQLDV/yc/SS-ZS-275/2018/生脉注射液/18011102 17120105 17122702 wdx17010301 17120707 17120805 17120806.seq/880.smp/UV\_VIS\_1.channel/UV\_VIS\_1.ch

#### Chromatogram

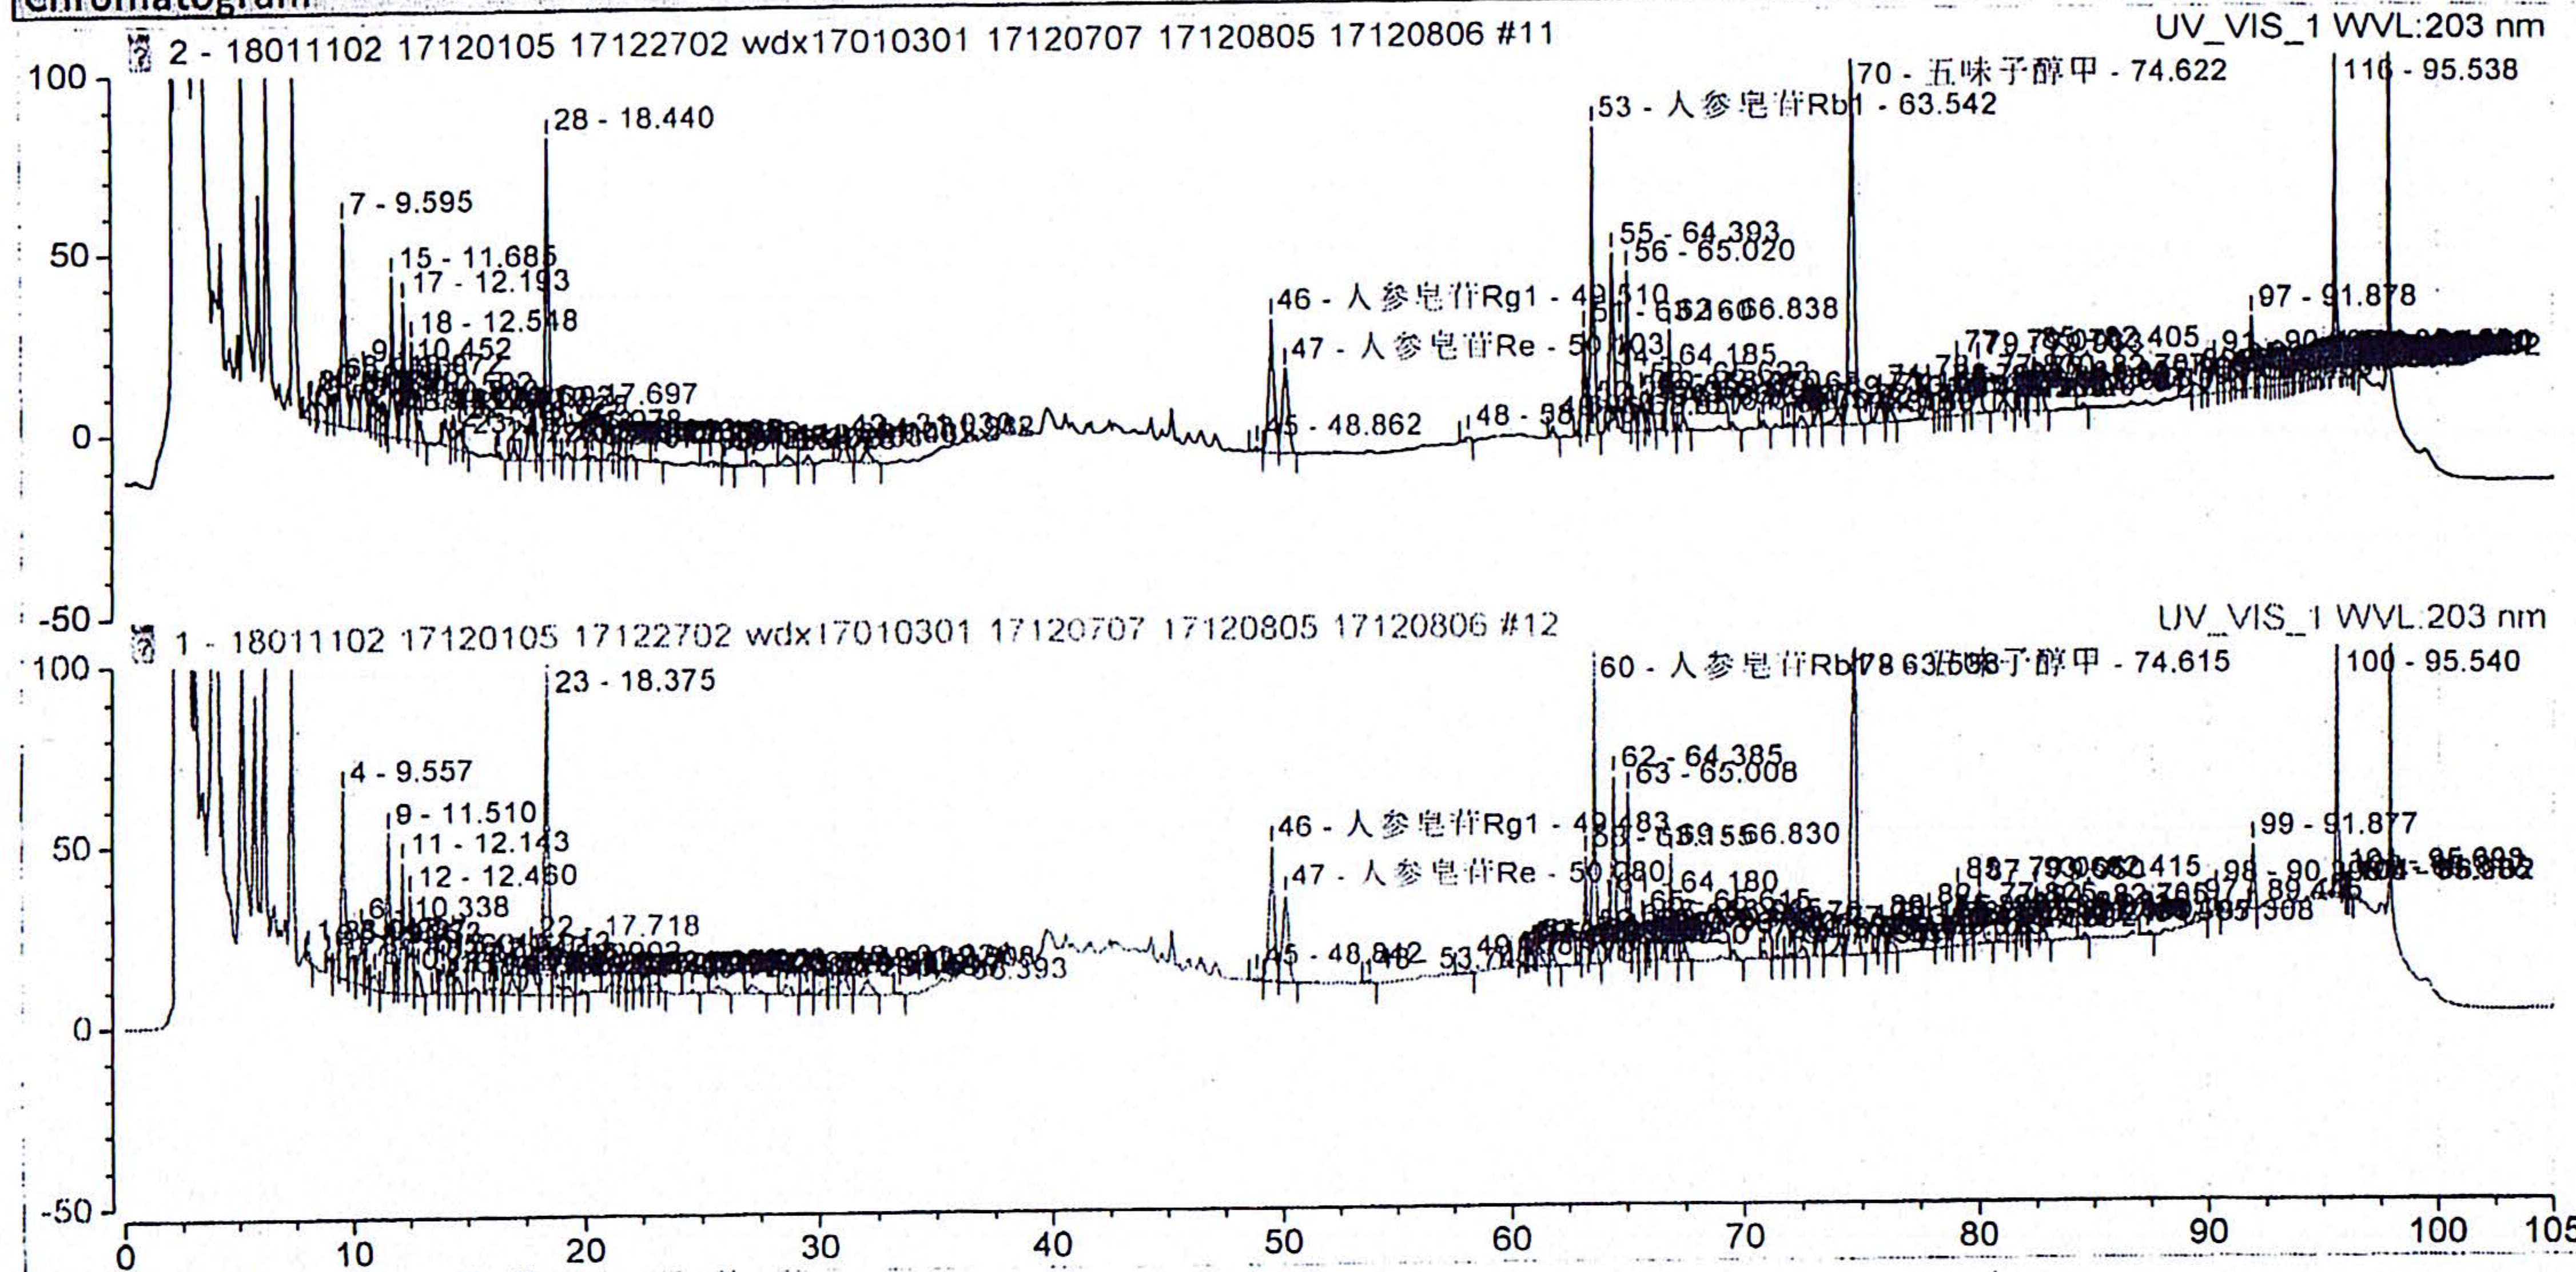

| No. | Injection Name | Ret. Time min | Area mAU*min | Position | Asymmetry (EP) | Resolution (EP) | Plates (EP) |
|-----|----------------|---------------|--------------|----------|----------------|-----------------|-------------|
|     |                | UV_VIS_1      | UV_VIS_1     |          | UV_VIS_1       | UV_VIS_1        | UV_VIS_1    |
|     |                | 人参皂苷Rg1       | 人参皂苷Rg1      |          | 人参皂苷Rg1        | 人参皂苷Rg1         | 人参皂苷Rg1     |
| 11  | 生脉注射液17120105  | 49.510        | 9.5150       | RA4      | n.a.           | 1.36            | 226269      |
| 12  | 生脉注射液17120105  | 49.483        | 9.5820       | RA4      | n.a.           | 1.40            | 236814      |

| No. | Injection Name | Ret. Time min | Inject Time         | Amount   | Average (5) |
|-----|----------------|---------------|---------------------|----------|-------------|
|     |                | UV_VIS_1      |                     | UV_VIS_1 | mg/ml       |
|     |                | 人参皂苷Rg1       |                     | 人参皂苷Rg1  | 平均含量        |
|     |                | 人参皂苷Rg1       |                     | 人参皂苷Rg1  | 人参皂苷Rg1     |
| 11  | 生脉注射液17120105  | 49.510        | 2018/01/13 05:35:15 | 0.1467   |             |
| 12  | 生脉注射液17120105  | 49.483        | 2018/01/13 07:21:29 | 0.1477   | 0.1472      |

| No. | Injection Name | Ret. Time min | Area mAU*min | Position | Asymmetry (EP) | Resolution (EP) | Plates (EP) |
|-----|----------------|---------------|--------------|----------|----------------|-----------------|-------------|
|     |                | UV_VIS_1      | UV_VIS_1     |          | UV_VIS_1       | UV_VIS_1        | UV_VIS_1    |
|     |                | 人参皂苷Re        | 人参皂苷Re       |          | 人参皂苷Rg1        | 人参皂苷Re          | 人参皂苷Re      |
| 11  | 生脉注射液17120105  | 50.103        | 6.6211       | RA4      | n.a.           | 20.59           | 190778      |
| 12  | 生脉注射液17120105  | 50.080        | 6.7514       | RA4      | n.a.           | 7.85            | 199280      |

| No. | Injection Name | Ret. Time min | Inject Time         | Amount   | Average (5) |
|-----|----------------|---------------|---------------------|----------|-------------|
|     |                | UV_VIS_1      |                     | UV_VIS_1 | mg/ml       |
|     |                | 人参皂苷Re        |                     | 人参皂苷Re   | 平均含量        |
|     |                | 人参皂苷Re        |                     | 人参皂苷Re   | 人参皂苷Re      |
| 11  | 生脉注射液17120105  | 50.103        | 2018/01/13 05:35:15 | 0.1223   |             |
| 12  | 生脉注射液17120105  | 50.080        | 2018/01/13 07:21:29 | 0.1247   | 0.1235      |

| No. | Injection Name | Ret. Time<br>min<br>UV_VIS_1<br>人参皂苷Rb1 | Area<br>mAU*min<br>UV_VIS_1<br>人参皂苷Rb1 | Position | Asymmetry (EP)<br>UV_VIS_1<br>人参皂苷Rg1 | Resolution (EP)<br>UV_VIS_1<br>人参皂苷Rb1 | Plates (EP)<br>UV_VIS_1<br>人参皂苷Rb1 |
|-----|----------------|-----------------------------------------|----------------------------------------|----------|---------------------------------------|----------------------------------------|------------------------------------|
| 11  | 生脉注射液17120105  | 63.542                                  | 10.5663                                | RA4      | n.a.                                  | 3.47                                   | 1860939                            |
| 12  | 生脉注射液17120105  | 63.538                                  | 10.5699                                | RA4      | n.a.                                  | 3.64                                   | 2009062                            |

| No. | Injection Name | Ret. Time<br>min<br>UV_VIS_1<br>人参皂苷Rb1 | Inject Time         | Amount<br>UV_VIS_1<br>人参皂苷Rb1 | Average (5)<br>mg/ml<br>平均含量<br>人参皂苷Rb1 |
|-----|----------------|-----------------------------------------|---------------------|-------------------------------|-----------------------------------------|
| 11  | 生脉注射液17120105  | 63.542                                  | 2018/01/13 05:35:15 | 0.2259                        |                                         |
| 12  | 生脉注射液17120105  | 63.538                                  | 2018/01/13 07:21:29 | 0.2260                        | 0.2259                                  |

| No. | Injection Name | Ret. Time<br>min<br>UV_VIS_1<br>五味子醇甲 | Area<br>mAU*min<br>UV_VIS_1<br>五味子醇甲 | Position | Asymmetry (EP)<br>UV_VIS_1<br>人参皂苷Rg1 | Resolution (EP)<br>UV_VIS_1<br>五味子醇甲 | Plates (EP)<br>UV_VIS_1<br>五味子醇甲 |
|-----|----------------|---------------------------------------|--------------------------------------|----------|---------------------------------------|--------------------------------------|----------------------------------|
| 11  | 生脉注射液17120105  | 74.622                                | 23.1462                              | RA4      | n.a.                                  | 3.56                                 | 704022                           |
| 12  | 生脉注射液17120105  | 74.615                                | 23.0884                              | RA4      | n.a.                                  | n.a.                                 | 862087                           |

| No. | Injection Name | Amount<br>UV_VIS_1<br>五味子醇甲 | Inject Time         | Average (3)<br>mg/ml<br>平均含量<br>五味子醇甲 | 含量<br>ug/ml<br>UV_VIS_1<br>五味子醇甲 | 含量<br>mg/ml<br>UV_VIS_1<br>人参皂苷Rg1+Re | 含量<br>mg/ml<br>平均含量<br>人参皂苷Rg1+Re+Rb1 |
|-----|----------------|-----------------------------|---------------------|---------------------------------------|----------------------------------|---------------------------------------|---------------------------------------|
| 11  | 生脉注射液17120105  | 0.0275                      | 2018/01/13 05:35:15 |                                       | 27.48                            | 0.271                                 | 0.497                                 |
| 12  | 生脉注射液17120105  | 0.0274                      | 2018/01/13 07:21:29 | 0.0275                                | 27.48                            | 0.271                                 | 0.497                                 |

检验人: 杨霞 2018.01.15

复核人: 王磊 2018.01.15
